# Supplementary material for: Development and validation of a Japanese version of the Patient Centred Assessment Method and its user guide: a cross-sectional study
Source: HighWire-hosted journal article supplement (doi:10.1136/bmjopen-2020-037282), 2020-11-01
Supplement: bmjopen-2020-037282supp001_data_supplement.pdf [file bmjopen-2020-037282supp001_data_supplement.pdf]

日本語版  
Patient Centered  
Assessment Method  
(PCAM)

ID \_\_\_\_\_ 年 \_\_\_\_\_ 月 \_\_\_\_\_ 日

医師/看護師：

実施上の注意点：この評価シートをガイドとして使用し、あなたが各質問に答えやすいように、面談の間にあなた自身の言葉で患者に質問してください。この患者に関連した複雑性のレベルを反映させるように各項目で選択肢一つに丸をつけてください。面談の間か、もしくはその後で完成させてください。

### 身体 の 健康 と 心 の 安 寧

|   |                                                                                         |                                                                         |                                                                                          |                                                                                 |
|---|-----------------------------------------------------------------------------------------|-------------------------------------------------------------------------|------------------------------------------------------------------------------------------|---------------------------------------------------------------------------------|
| 1 | 患者の身体 の 健康 についてどのようなニーズがあるかを考えた場合、更に <b>精査</b> が必要と思われる不確かな症状や問題（危険因子）があるか？             |                                                                         |                                                                                          |                                                                                 |
|   | 不確かな問題は見出され<br>ない、あるいは問題はすでに<br>吟味されている                                                 | 軽度の漠然とした身体的症<br>状あるいは問題がある；<br>しかし日常生活に影響を及<br>ぼさないか、患者の心配事<br>ではない     | 日常生活に影響を及ぼす中<br>等度から重度の症状あるい<br>は問題がある                                                   | 日常生活に重大な影響を及<br>ぼす重度の症状あるいは問<br>題がある                                            |
| 2 | 患者の身体 の 健康 が 心 の 安 寧 に 影響 しているか？                                                        |                                                                         |                                                                                          |                                                                                 |
|   | 懸念される問題は見出され<br>ない                                                                      | 心 の 安 寧 に 軽 度 の 影 響 を 与<br>えている（例：“うんざり<br>する感じ”、“楽しみが<br>減っている”）       | 心 の 安 寧 に 中 等 度 から 重 度<br>の 影 響 を 与 えて お り、 日 常<br>生 活 の 楽 し み を 妨 げ て い る               | 心 の 安 寧 に 重 度 の 影 響 を 与<br>えて お り、 日 常 生 活 を 妨 げ<br>て い る                       |
| 3 | 身体 の 健康 や 心 の 安 寧 に 影 響 す る よ う な 生 活 習 慣 （ア ル コ ー ル、 薬、 食 事、 運 動） に 伴 う 問 題 が 有<br>るか？ |                                                                         |                                                                                          |                                                                                 |
|   | 懸念される問題は見出され<br>ない                                                                      | 身体 の 健康 や 心 の 安 寧 に 悪<br>い 影 響 を 与 え る 可 能 性 が 有<br>る 軽 度 の 問 題 を 認 め る | 身体 の 健康 や 心 の 安 寧 に 中<br>等 度 から 重 度 の 影 響 を 与 え<br>て お り、 日 常 生 活 の 楽 し み<br>を 妨 げ て い る | 身体 の 健康 や 心 の 安 寧 に 重<br>度 の 影 響 を 与 え て お り、 他<br>者 に も 影 響 す る 可 能 性 が 有<br>る |
| 4 | 患者の心 の 安 寧 について他に何らかの懸念される問題があるか？ その深刻さや患者に与える影響<br>をどのくらいと評価するか？                       |                                                                         |                                                                                          |                                                                                 |
|   | 懸念される問題は見出され<br>ない                                                                      | 軽 度 な 問 題 一 日 常 機 能 を 妨<br>げ ない                                         | 中 等 度 から 重 度 の 問 題 が 有<br>り 日 常 機 能 を 妨 げ て い る                                          | ほ と ん だ の 日 常 機 能 を 妨 げ<br>る 重 度 の 問 題 が 有 る                                    |

### 社 会 的 環 境

|   |                                                             |                                   |                              |                                     |
|---|-------------------------------------------------------------|-----------------------------------|------------------------------|-------------------------------------|
| 1 | 安全性、安定性の点（家庭内暴力、安全でない家、隣人の嫌がらせを含む）から住居環境をどのよ<br>うに評価するか？    |                                   |                              |                                     |
|   | 一貫して安全で、支援的、<br>安定している状態で、問題<br>は見受けられない                    | 安全で、安定しているがや<br>や一貫性に欠ける          | 安全/安定しているか疑問<br>がある          | 安全でなく、安定もしてい<br>ない                  |
| 2 | 日常の活動は患者の（心）安寧にどう影響を与えているか（現在失業中か予想される失業、仕<br>事、介護、その他を含む）？ |                                   |                              |                                     |
|   | 問題は見いだされ<br>ないか、あるいは恩恵があると感じ<br>ている                         | ある程度ありきたりの不満<br>があるが、気がかりではな<br>い | 時々、気分の落ち込みやス<br>トレスの一因となっている | 心 の 安 寧 に 重 度 の 悪 影 響 を<br>与 えて い る |

|                                               |                                   |                             |                                        |
|-----------------------------------------------|-----------------------------------|-----------------------------|----------------------------------------|
| 3 社会ネットワーク（家族、仕事、友人）についてどのように評価するか？           |                                   |                             |                                        |
| 社会ネットワークに十分に<br>参加している                        | 社会ネットワークに不足な<br>く参加している           | ある程度、社会的に孤立<br>し、参加が制限されている | 孤独で社会的に孤立し、ほ<br>とんど参加していない             |
| 4 金銭面（すべての必要な医療ケアを受ける余裕があることを含む）についてはどう評価するか？ |                                   |                             |                                        |
| 金銭的に安定し、十分な収<br>入があり、問題は見いださ<br>れない           | 金銭的に安定しているが、<br>収入にいくつかの問題があ<br>る | 金銭的に不安定で、収入に<br>いくつかの問題がある  | 金銭的に不安定で、収入は<br>極わずかしくなく、問題に<br>直面している |

### 健康リテラシーとコミュニケーション

|                                                                      |                                                        |                                         |                                     |
|----------------------------------------------------------------------|--------------------------------------------------------|-----------------------------------------|-------------------------------------|
| 1 自分の健康・安寧（症状、徴候、危険因子）と健康管理に必要なことを、患者は今、どの程度よく理解しているか？               |                                                        |                                         |                                     |
| 合理的によく理解してい<br>て、すでに健康管理をして<br>いるか、あるいはより良い<br>管理をすることをいとわな<br>い     | 合理的によく理解してい<br>るがしかし、現時点ではアド<br>バイスを受け入れられない<br>と感じている | より良い管理を可能にする<br>ような理解を少ししかして<br>いない     | 健康管理をするための重要<br>なことについて理解してい<br>ない  |
| 2 患者はどのくらいヘルスケアの話し合いに参加することができるか（言語の壁、聴覚欠如、失語症、アルコールや薬物問題、学習困難、集中力）？ |                                                        |                                         |                                     |
| 妨げがなく、率直なコミュ<br>ニケーションで、障壁は見<br>出されない                                | わずかな障壁があるもの<br>の、不足のないコミュニ<br>ケーションである                 | 中等度の障壁があり、コ<br>ミュニケーション上のいく<br>らかの困難がある | 重度な障壁を伴うコミュ<br>ニケーション上の深刻な困難<br>がある |

### サービスコーディネーション

|                                                         |                                           |                                            |                                              |
|---------------------------------------------------------|-------------------------------------------|--------------------------------------------|----------------------------------------------|
| 1 患者を支援するために必要な他のサービスはあるか？                              |                                           |                                            |                                              |
| 現時点では他のケア/サー<br>ビスは必要としていない                             | 他のケア/サービスはすで<br>に受けており、不足はない              | ケア/サービスを受けてい<br>るが、十分ではない                  | ケア/サービスを受けてお<br>らず、受ける必要がある                  |
| 2 現在、患者に関わっているサービスは良く調整されているか（あなたが今薦めている他のサービスとの調整も含む）？ |                                           |                                            |                                              |
| すべての必要なケア/サー<br>ビスをすで受けており、良<br>好に調整されている               | 必要なケア/サービスをす<br>でに受けており、不足なく<br>調整がなされている | 必要なケア/サービスはす<br>でに受けているが、いくら<br>かの調整に妨げがある | 必要なケア/サービスが欠<br>如していて、（かつ/ある<br>いは）調整が断片的である |

|       |      |       |       |
|-------|------|-------|-------|
| 通常のケア | 経過観察 | プラン作成 | すぐに実施 |
|-------|------|-------|-------|

|            |              |              |            |
|------------|--------------|--------------|------------|
| どんな行動が必要か？ | 誰に協力を求めるべきか？ | 行動のための妨げは何か？ | どんな行動をとるか？ |
|            |              |              |            |
| 備考：        |              |              |            |
|            |              |              |            |
