# Supplementary material for: Development and validation of a Japanese version of the Patient Centred Assessment Method and its user guide: a cross-sectional study
Source: HighWire-hosted journal article supplement (doi:10.1136/bmjopen-2020-037282), 2020-11-01
Supplement: bmjopen-2020-037282supp002_data_supplement.pdf [file bmjopen-2020-037282supp002_data_supplement.pdf]

## 日本語版 Patient Centered Assessment Method (PCAM) 評価実施のためのユーザーガイド

### <身体 の健康 と心 の安寧>

#### 項目 1 : 身体 の健康 について のニーズ

|                                 |                                                                       |                                         |                                       |
|---------------------------------|-----------------------------------------------------------------------|-----------------------------------------|---------------------------------------|
| 1.                              | 患者の身体 の健康 について どのようなニーズがあるかを考えた場合、更に精査が必要と思われる不確かな症状や問題（危険因子）があるか？    |                                         |                                       |
| 不確かな問題は見出されない、あるいは問題はすでに吟味されている | 軽度の漠然とした身体的症状 <u>あるいは問題</u> がある； <u>しかし</u> 日常生活に影響を及ぼさないか、患者の心配事ではない | 日常生活に影響を及ぼす中等度から重度の症状 <u>あるいは問題</u> がある | 日常生活に重大な影響を及ぼす重度の症状 <u>あるいは問題</u> がある |

この項目では、健康診断の際に行われた身体的な検査の結果として見出だされた危険因子（血圧、血糖値）を含めてください。さらに、患者が自発的に挙げた問題、また、自身に影響を及ぼしている健康問題があるか尋ねてください。患者はすでにケアを受けているかもしれませんが、症状が変化していたり、持続して日常生活に影響を与えているかもしれません。

#### 尋ねたらよいと思われる質問項目サンプル :

- ・現時点でのあなたの健康状態について述べてください。
- ・身体 の健康 についてはいかがでしょうか。
- ・もし、診療所以外（非医療機関）で PCAM による評価が行われている場合、あなたは医者にかかる必要が最近ありましたか？それは何のためですか？

#### 項目 2 : 身体 の健康 が心 の安寧 に与える影響

|                |                                              |                                        |                               |
|----------------|----------------------------------------------|----------------------------------------|-------------------------------|
| 2.             | 患者の身体 の健康 が心 の安寧 に影響しているか？                   |                                        |                               |
| 懸念される問題は見出されない | 心 の安寧 に軽度の影響を与えている（例：“うんざりする感じ”、“楽しみが減っている”） | 心 の安寧 に中等度から重度の影響を与えており、日常生活の楽しみを妨げている | 心 の安寧 に重度の影響を与えており、日常生活を妨げている |

ここでは、項目 1 で挙げられた問題や、生活習慣上の問題による身体 の症状 を考慮することになるでしょう。

#### 尋ねたらよいと思われる質問項目サンプル :

- ・私たちがあなたの身体 の症状 や状態 について話し合っている時、どのように感じますか？
- ・X という状態 は現時点 であなた にどのように影響していますか？
- ・あなたの心 の状態 はいかがですか？
- ・あなたはストレスを感じたり、うんざりする感じが少しでもありますか？

## 項目 3 : ライフスタイルが身体の健康と心の安寧に与える影響

|                |                                                |                                            |                                       |
|----------------|------------------------------------------------|--------------------------------------------|---------------------------------------|
| 3.             | 身体の健康や心の安寧に影響するような生活習慣（アルコール、薬、食事、運動）上の問題があるか？ |                                            |                                       |
| 懸念される問題は見出されない | 身体の健康や心の安寧に悪い影響を与える可能性がある軽度の問題を認める             | 身体の健康や心の安寧に中等度から重度の影響を与えており、日常生活の楽しみを妨げている | 身体の健康や心の安寧に重度の影響を与えており、他者にも影響する可能性がある |

この項目では、アルコール、薬物使用、食事、運動のような生活習慣による影響と、それらが身体と心の健康の両方にどのように影響を及ぼしているかを考慮しましょう。

## 尋ねたらよいと思われる質問項目サンプル :

- ・あなたはアルコールや薬物使用について、何か気になることがありますか？
- ・健康を維持するためにあなたがしていることはどんなことですか？運動？食事？

## 項目 4 : その他の心の安寧の問題

|                |                                                          |                         |                       |
|----------------|----------------------------------------------------------|-------------------------|-----------------------|
| 4.             | 患者の心の安寧について他に何らかの懸念される問題があるか？その深刻さや患者に与える影響をどのくらいと評価するか？ |                         |                       |
| 懸念される問題は見出されない | 軽度な問題—日常機能を妨げない                                          | 中等度から重度の問題があり日常機能を妨げている | ほとんどの日常機能を妨げる重度の問題がある |

ここでは、上記で考慮されたこと以外の心の安寧について考慮しましょう。ここでは統合失調症等のような厳しい状況に加えて、不安、うつ、自尊心、死別、虐待、人間関係、雇用問題が含まれるかもしれません。あなたは時間制限のある面談中に“パンドラの箱を開ける”ことを心配するかもしれません。このことは経験、訓練、サービスマニリングによってしばしば軽減することができます。（例：さらに案件を話し合うために、再度患者に来てもらえるようにすること）

時々、患者は希死念慮を表出するかもしれません。リスク評価を訓練することがこの問題に対処するのに役立つでしょう。こういう思いを訴える患者は、めったに差し迫った危険な状態であることはないでしょう。そして、会話がその危険を軽減することに役立つかもしれません。

## 尋ねたらよいと思われる質問項目サンプル :

- ・生活において、あなたの健康に影響を及ぼしているかもしれない、他のことはありませんか？
- ・個人的な人間関係が失われたり、変化したりしましたか？
- ・あなたは生活をどのくらいうまく管理できていると感じますか？

**<社会的環境>**

## 項目 1 : 居住環境

|                                  |                                                      |                 |               |
|----------------------------------|------------------------------------------------------|-----------------|---------------|
| 1.                               | 安全性、安定性の点（家庭内暴力、安全でない家、隣人の嫌がらせを含む）から住居環境をどのように評価するか？ |                 |               |
| 一貫して安全で、支援的、安定している状態で、問題は見受けられない | 安全で、安定しているがやや一貫性に欠ける                                 | 安全/安定しているか疑問がある | 安全でなく、安定していない |

この質問項目では（患者と）話し合うには困難でやりがいがある領域になりますが、経験上、このツールを試しに使用した看護師は非常に有益であると見出しています。心の安寧についての話し合いを通して、問題が浮かび上がってくるかもしれません。患者が言ったことをそのまま受け売りで環境を評価することはできませんが、ここでは報告したことを記録することになるでしょう。この時点で、危険にさらされている患者はこの問題について打ち明けることはできないかもしれません。しかし、患者と普段通りに自然な態度で話し始めると、いずれ打ち明けてくれるかもしれません。

## 尋ねたらよいと思われる質問項目サンプル：

- ・ お家ではいかがですか？
- ・ お家やご近所は安全だと感じていますか？
- ・ あなたは自分の住んでいるところについて満足と感じていますか？なぜそう感じますか？/感じないのはなぜですか？

## 項目 2 : 日常の活動

|                                    |                                                          |                                  |                       |
|------------------------------------|----------------------------------------------------------|----------------------------------|-----------------------|
| 2.                                 | 日常の活動は患者の（心の）安寧にどう影響を与えているか？（現在失業中か予想される失業、仕事、介護、その他を含む） |                                  |                       |
| 問題は見いだされな<br>か、あるいは恩恵がある<br>と感じている | ある程度ありきたりの<br>不満があるが、気がか<br>りではない                        | 時々、気分の落ち込みやス<br>トレスの一因となってい<br>る | 心の安寧に重度の悪<br>影響を与えている |

仕事のストレス、失業、責任のある介護はすべて安寧を貧しくする可能性があります。

## 尋ねたらよいと思われる質問項目サンプル：

- ・ 現在、日常の活動をいつも通りに送れていますか？それはなぜ？/なぜできないのですか？
- ・ （もし、雇用されているなら）毎日仕事に行くことを楽しんでいますが？または仕事によってストレスが生じていますか？
- ・ 日常生活や（心の）安寧に影響を与えるような責任を抱えていますか？

## 項目 3 : 社会ネットワーク

|                    |                                   |                         |                        |
|--------------------|-----------------------------------|-------------------------|------------------------|
| 3.                 | 社会ネットワーク（家族、仕事、友人）についてどのように評価するか？ |                         |                        |
| 社会ネットワークに十分に参加している | 社会ネットワークに不足なく参加している               | ある程度、社会的に孤立し、参加が制限されている | 孤独で社会的に孤立し、ほとんど参加していない |

適切な社会ネットワークはうつ、不安、自殺を予防できます。

## 尋ねたらよいと思われる質問項目サンプル：

- ・もしあなたが問題や気分の落ち込みを感じたら、だれに話せますか？
- ・あなたは友達や家族から良く支えられていると感じますか？なぜそう感じますか？/感じないのはなぜですか？
- ・他にどのような支えが必要ですか？

## 項目 4 : 金銭的な収入

|                             |                                             |                        |                                |
|-----------------------------|---------------------------------------------|------------------------|--------------------------------|
| 4.                          | 金銭面（すべての必要な医療ケアを受ける余裕があることを含む）についてはどう評価するか？ |                        |                                |
| 金銭的に安定し、十分な収入があり、問題は見いだされない | 金銭的に安定しているが、収入にいくつかの問題がある                   | 金銭的に不安定で、収入にいくつかの問題がある | 金銭的に不安定で、収入は極わずかしかなく、問題に直面している |

借金や金銭面についての心配は心の安寧にとって、重大な危険因子となります。初めはこのことを話すのは難しい話題になり得ますが、現在の経済状況や増大する収入格差という文脈のなかで、“多くの人は今、職を失うことや、収入の範囲内でやっていけるかを心配していますが、あなたはどうですか？”というように質問を一般化して始めることが有用かもしれません。

## 追加して尋ねたらよいと思われる質問項目サンプル：

- ・あなたは金銭的にゆとりがあると感じていますか？
- ・あなたは健康管理に関連した費用を支払えると感じていますか？

## &lt;健康リテラシーとコミュニケーション&gt;

## 項目 1 : 健康リテラシー

|                                                   |                                                      |                              |                            |
|---------------------------------------------------|------------------------------------------------------|------------------------------|----------------------------|
| 1.                                                | 自分の健康・安寧（症状、徴候、危険因子）と健康管理に必要なことを、患者は今、どの程度よく理解しているか？ |                              |                            |
| 合理的によく理解していて、すでに健康管理をしているか、あるいはより良い管理をすることをいとわない。 | 合理的によく理解しているがしかし、現時点ではアドバイスを受け入れられないと感じている           | より良い管理を可能にするような理解を少ししかしていない。 | 健康管理をするための重要なことについて理解していない |

この項目は援助を受ける際の障害を明らかにすることを意図しています。これを文書化しておく、今後のコンサルテーションに対しての情報提供や、さらに患者と話し合う機会を持つための理由として役に立つかもしれません。患者は健康の一つの側面は理解していますが、他の側面は理解していないかもしれません（例えば、喫煙量を減らす必要性は理解しているかもしれませんが、自宅での怒りが健康問題だとは理解していないかもしれません）。ここでのあなたの記録は全体像を反映しているべきです。もし患者に前向きに進み始めるための理解が十分にあれば、緑か黄色につけるとよいでしょう。

尋ねたらよいと思われる質問項目サンプル：

- ・あなたは医療者にまだ質問があると感じていますか？他に知りたいことは何でしょうか？
- ・あなたは健康、診断、問題について必要な情報をすべて持っていると感じますか？
- ・あなたの生活を、医療者が提案したように変えるという準備ができていると感じていますか？（食事、運動、健康管理）

項目 2：話し合いへの参加

|                               |                                                                    |                                 |                             |
|-------------------------------|--------------------------------------------------------------------|---------------------------------|-----------------------------|
| 2.                            | 患者はどのくらいヘルスケアの話し合いに参加することができるか？（言語の壁、聴覚欠如、失語症、アルコールや薬物問題、学習困難、集中力） |                                 |                             |
| 妨げがなく、率直なコミュニケーションで、障壁は見出されない | わずかな障壁があるものの、不足のないコミュニケーションである                                     | 中等度の障壁があり、コミュニケーション上のいくつかの困難がある | 重度な障壁を伴うコミュニケーション上の深刻な困難がある |

上記のように、この項目では必要とされる治療よりも、話し合いに参加するための障壁を強調することを意図しています。このことは、患者にもう一度戻ってきてもらって、通訳者のような援助を提供できたり、学習困難者を援助するための資源を紹介できるかもしれません。

尋ねたらよいと思われる質問項目サンプル：

- ・医療者はあなたが理解しやすい方法で彼らの考えをあなたに説明をしますか？
- ・どうしたら医療者により理解してもらいやすくなりますか？

<サービスコーディネーション>

項目 1：その他のサービス

|                         |                          |                       |                        |
|-------------------------|--------------------------|-----------------------|------------------------|
| 1.                      | 患者を支援するために必要な他のサービスはあるか？ |                       |                        |
| 現時点では他のケア/サービスは必要としていない | 他のケア/サービスはすでに受けており、不足はない | ケア/サービスを受けているが、十分ではない | ケア/サービスを受けおらず、受ける必要がある |

この項目は、あなたが薦める（他のサービスへの）紹介と、あなたの薦めに対して従うことへの患者の関心と意思を評価するために使ってください。たくさんの紹介があるかもしれません。その中のいくつかは患者は受け入れたいと思っているでしょうし、その他は、現時点では解決しようとしていないかもしれません。この紹介というものは、行動の必要性についてのあなたの意見を反映しているものです。実際に

行われた紹介はあなたの意見と患者の希望を反映しています。患者は現時点ではこの紹介は適切でないと判断するかもしれません。

尋ねたらよいと思われる質問項目サンプル：

- ・あなたは医療者やケアに関わっている他の人々から、現時点で必要なすべてのケアを受けていると感じていますか？
- ・あなたは私が提案した薦めについてどのくらい満足していますか？
- ・あなたが経過を見たい、解決したい最重要課題のように感じているものは何でしょうか？

項目 2：サービスコーディネーション

|                                    |                                                       |                                    |                                      |
|------------------------------------|-------------------------------------------------------|------------------------------------|--------------------------------------|
| 2.                                 | 現在、患者に関わっているサービスは良く調整されているか？（あなたが今薦めている他のサービスとの調整も含む） |                                    |                                      |
| すべての必要なケア/サービスをすでに受けており、良好に調整されている | 必要なケア/サービスをすでに受けており、不足なく調整がなされている                     | 必要なケア/サービスはすでに受けているが、調整にいくらかの妨げがある | 必要なケア/サービスが欠如していて、（かつ/あるいは）調整が断片的である |

この項目は、すべてのケアとサービス（あなたが評価する前にすでに受けていることも含めて）がどの程度うまく調整できているかを示すために使用してください。もし、サービスとケアが断片的で、患者が利用することが難しい場合は、例え患者がやると決めて、良く参加していても、やり遂げることができないかもしれません。

尋ねたらよいと思われる質問項目サンプル：

- ・あなたが利用しているすべてのサービスはどのくらいうまく組み立てられたものですか？
- ・あなたが利用しているサービスは簡単にアクセスすることができて、あなたが利用できる時に提供されていますか？
- ・サービスやケアを受ける準備や、そこにアクセスすることが困難で、それら（サービスやケア）を受けられないことがありますか？

このセクションは、あなたが薦めている行動、誰に紹介するか、妨げになるもの、そして、患者が何をしたいかという意味表示を要約するために使しましょう。

|            |              |              |            |
|------------|--------------|--------------|------------|
| どんな行動が必要か？ | 誰に協力を求めるべきか？ | 行動のための妨げは何か？ | どんな行動をとるか？ |
| 備考：        |              |              |            |
